# Supplementary material for: High-Resolution Mutation Mapping Reveals Parallel Experimental Evolution in Yeast
Source: PLOS journal article supplement (doi:10.1371/journal.pbio.0040256), 2006-07-20
Supplement: S4 (10.1371/journal.pbio.0040256.s004) [file journal.pbio.0040256.s004]

##### Table S4. Genotype of yeast strains

| Strains isogenic with W303 | |
| --- | --- |
| JYL13 | *MATa ura3-1 his3-11,15 trp1-1 ade2-1 can1-100* |
| AVS4 | *MATa ura3-1 his3-11,15 trp1-1 ade2-1 can1-100 KANR HYGR NATR* |
| JYL243 | *bud5::FUR1::MATa::tsm1::LYS5**his3-11,15 leu2-3,112 can1-100 trp1-1::TSM1::TRP1 ura3∆ lys5∆ fur1∆ trp5∆ msh2∆::KAN* |
| JYL246 | *bud5::URA3::MAT::tsm1::TRP5**his3-11,15 leu2-3,112 can1-100 trp1-1::TSM1::TRP1 ura3∆ lys5∆ fur1∆ trp5∆ msh2∆::KAN* |
| Strains isogenic with SK1 | |
| JYL394 | *MAT ura3 ( SmaI-PstI) trp1::hisG leu2::hisG lys5::3xHA ho::hisG GAL3* |
| JYL631 | *bud5::FUR1::MATa::tsm1::LYS5**his3::hisG leu2::hisG trp1∆::TSM1::TRP1 ura3∆ lys5∆ fur1∆ trp5∆ flo8∆* |
| JYL632 | *bud5::URA3::MAT::tsm1::TRP5**his3::hisG leu2::hisG trp1∆::TSM1::TRP1 ura3∆ lys5∆ fur1∆ trp5∆ flo8∆* |
| Other strains | |
| BY4742 | *MAThis3∆ leu2∆ lys2∆ ura3∆* |
| YJM789 | *MAT ho::hisG*  *gal2 lys2* |
